# Supplementary material for: Down-Regulated Phosphoglycerate Kinase 1 Expression Is Associated With Poor Prognosis in Patients With Gallbladder Cancer
Source: PubMed Central journal article supplement (PMC5008514; doi:10.1097/md.0000000000002244), 2015-12-11

# Supplementary Figure 1

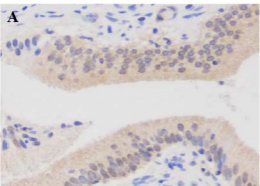

Non cancerous gallbladder mucosa

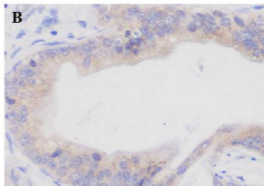

Well differentiated gallbladder adenocarcinoma

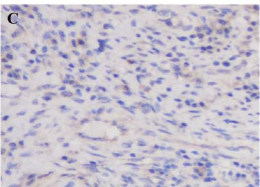

Poorly differentiated gallbladder cancer

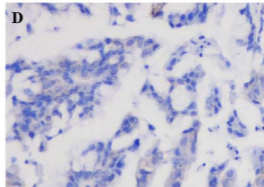

Undifferentiated gallbladder cancer

## TISSUE ATLAS ? »

|                              |                                                                                                                 |
|------------------------------|-----------------------------------------------------------------------------------------------------------------|
| Gene description             | Phosphoglycerate kinase 1                                                                                       |
| RNA tissue category          | Expressed in all.                                                                                               |
| Protein class                | Disease related genes, Enzymes, Plasma proteins, Potential drug targets, Predicted intracellular proteins       |
| Predicted localization       | Intracellular                                                                                                   |
| Protein evidence             | Evidence at protein level                                                                                       |
| Protein expression           | Ubiquitous cytoplasmic and nuclear expression.                                                                  |
| Data reliability description | Antibody staining mainly consistent with RNA expression data. Caution, targets protein from more than one gene. |
| Data reliability             | Uncertain based on 2 antibodies.                                                                                |

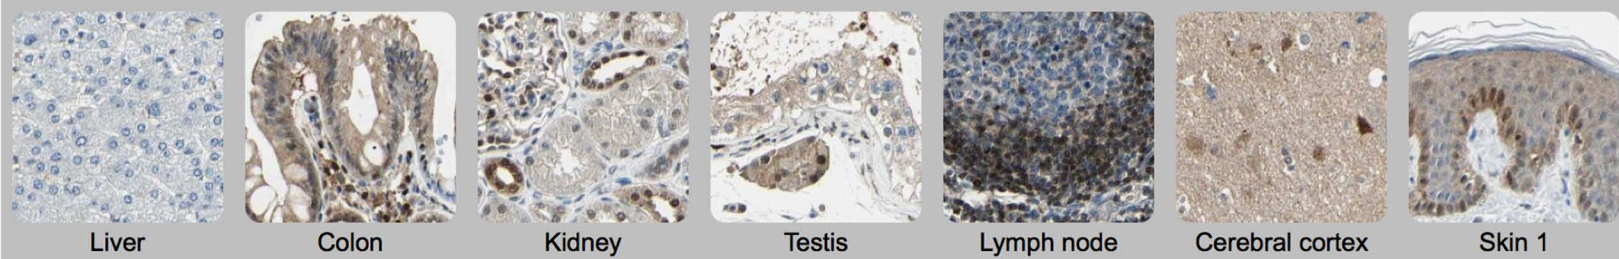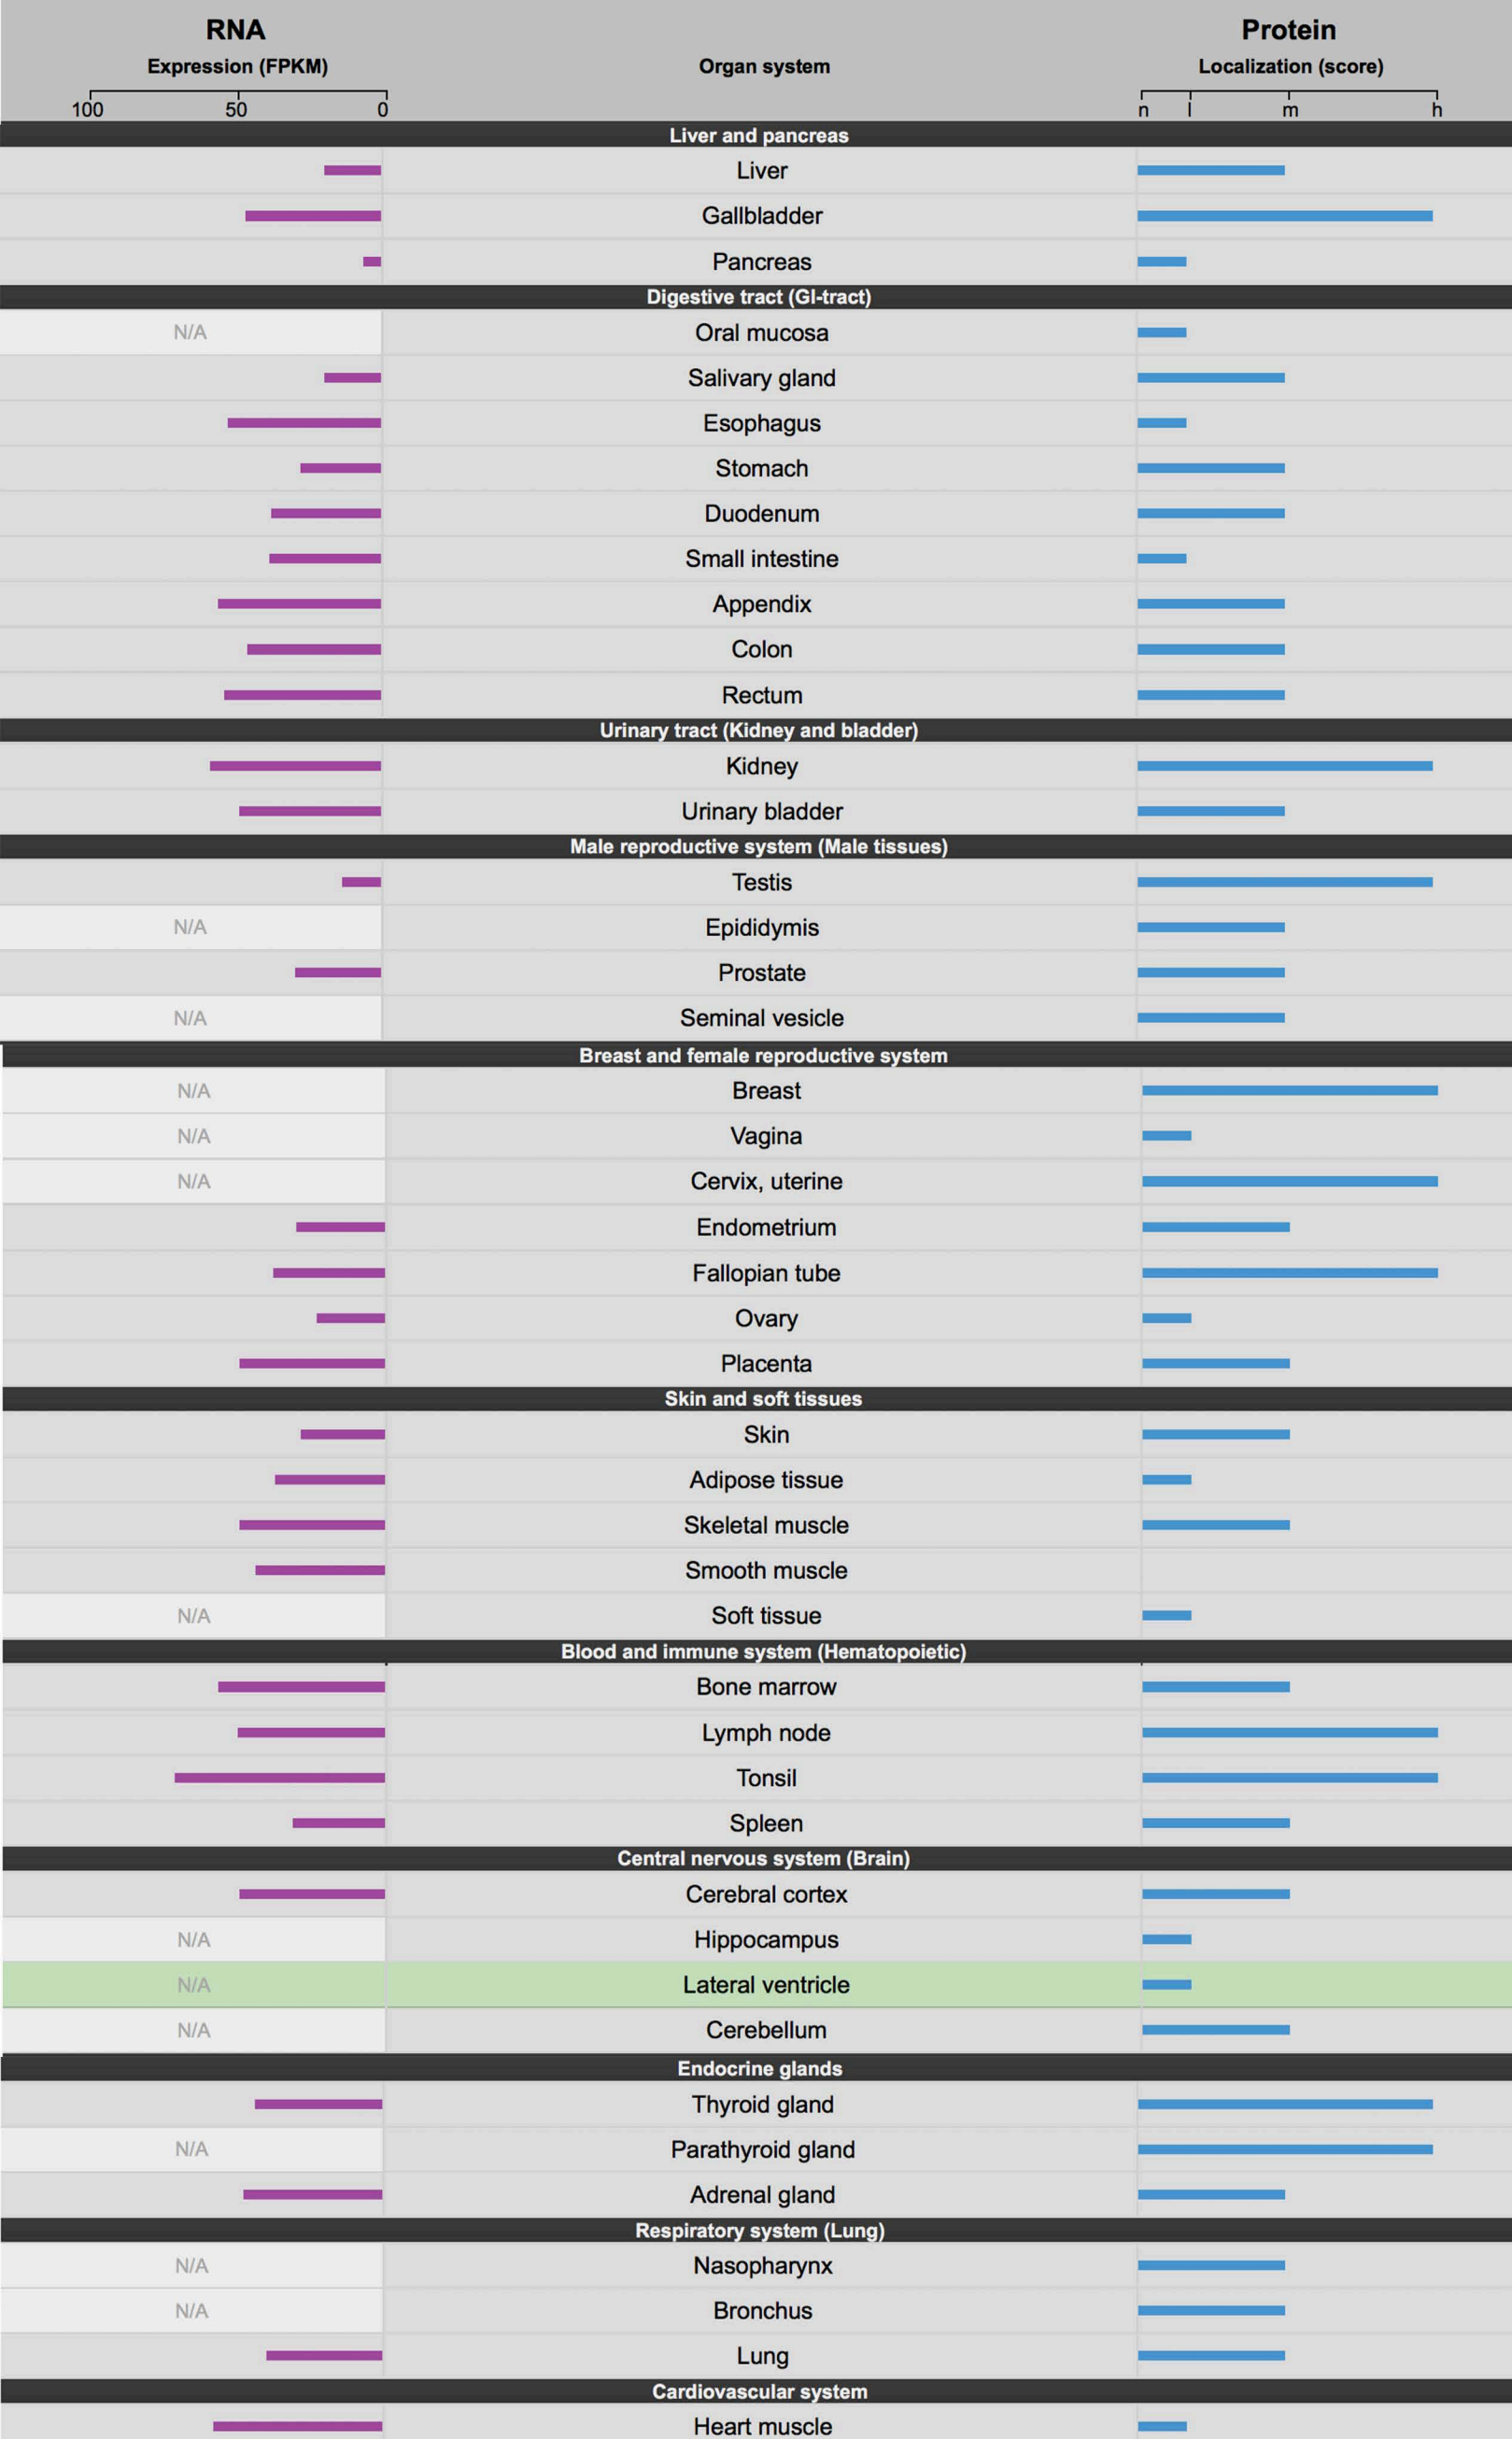

Supplement: medi-94-e2244-s002.pdf [file medi-94-e2244-s002.pdf]
